# Supplementary material
Source: Springer Nature journal article supplement (https://www.springermedizin.de/resource/supplementary/13054_2012_1682_MOESM6_ESM.pdf/9711252)

**a**

Figure 5a. All non-diabetics

Mean < 80 vs. 80-110  
 Mean < 80 vs. 110-140  
 Mean < 80 vs. 140-180  
 Mean < 80 vs. > 180  
 Mean 80-110 vs. 110-140  
 Mean 80-110 vs. 140-180  
 Mean 80-110 vs. > 180  
 Mean 110-140 vs. 140-180  
 Mean 110-140 vs. > 180  
 Mean 140-180 vs. > 180  
 Min < 40 vs. 40-69  
 Min < 40 vs. No hypoglycemia  
 Min 40-69 vs. No hypoglycemia  
 CV < 20% vs. 20-40%  
 CV < 20% vs. > 40%  
 CV 20-40% vs. > 40%

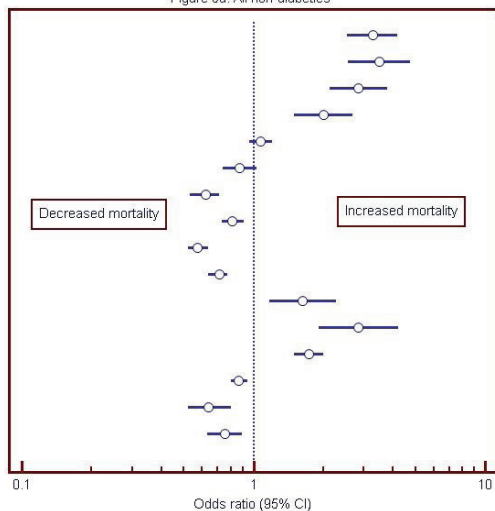**b**

Figure 5b. Medical non-diabetics

Mean < 80 vs. 80-110  
 Mean < 80 vs. 110-140  
 Mean < 80 vs. 140-180  
 Mean < 80 vs. > 180  
 Mean 80-110 vs. 110-140  
 Mean 80-110 vs. 140-180  
 Mean 80-110 vs. > 180  
 Mean 110-140 vs. 140-180  
 Mean 110-140 vs. > 180  
 Mean 140-180 vs. > 180  
 Min < 40 vs. 40-69  
 Min < 40 vs. No hypoglycemia  
 Min 40-69 vs. No hypoglycemia  
 CV < 20% vs. 20-40%  
 CV < 20% vs. > 40%  
 CV 20-40% vs. > 40%

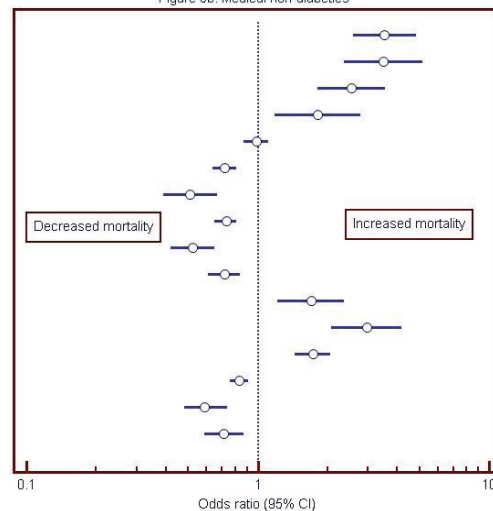**c**

Figure 5c. Surgical non-diabetics

Mean < 80 vs. 80-110  
 Mean < 80 vs. 110-140  
 Mean < 80 vs. 140-180  
 Mean < 80 vs. > 180  
 Mean 80-110 vs. 110-140  
 Mean 80-110 vs. 140-180  
 Mean 80-110 vs. > 180  
 Mean 110-140 vs. 140-180  
 Mean 110-140 vs. > 180  
 Mean 140-180 vs. > 180  
 Min < 40 vs. 40-69  
 Min < 40 vs. No hypoglycemia  
 Min 40-69 vs. No hypoglycemia  
 CV < 20% vs. 20-40%  
 CV < 20% vs. > 40%  
 CV 20-40% vs. > 40%

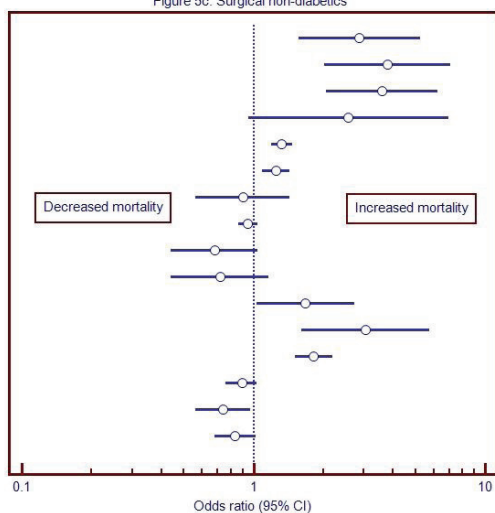**d**

Figure 5d. All diabetics

Mean < 80 vs. 80-110  
 Mean < 80 vs. 110-140  
 Mean < 80 vs. 140-180  
 Mean < 80 vs. > 180  
 Mean 80-110 vs. 110-140  
 Mean 80-110 vs. 140-180  
 Mean 80-110 vs. > 180  
 Mean 110-140 vs. 140-180  
 Mean 110-140 vs. > 180  
 Mean 140-180 vs. > 180  
 Min < 40 vs. 40-69  
 Min < 40 vs. No hypoglycemia  
 Min 40-69 vs. No hypoglycemia  
 CV < 20% vs. 20-40%  
 CV < 20% vs. > 40%  
 CV 20-40% vs. > 40%

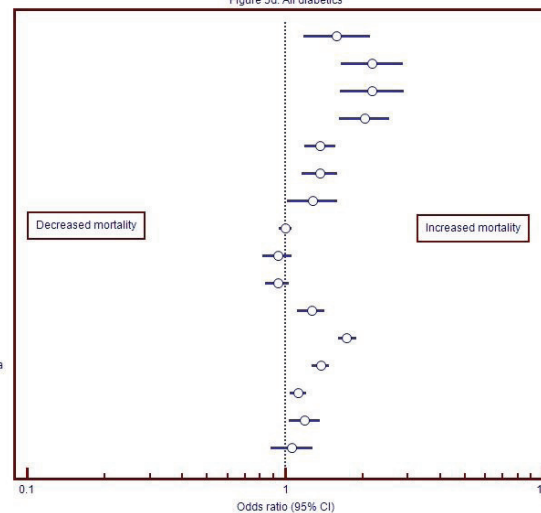**e**

Figure 5e. Medical diabetics

Mean < 80 vs. 80-110  
 Mean < 80 vs. 110-140  
 Mean < 80 vs. 140-180  
 Mean < 80 vs. > 180  
 Mean 80-110 vs. 110-140  
 Mean 80-110 vs. 140-180  
 Mean 80-110 vs. > 180  
 Mean 110-140 vs. 140-180  
 Mean 110-140 vs. > 180  
 Mean 140-180 vs. > 180  
 Min < 40 vs. 40-69  
 Min < 40 vs. No hypoglycemia  
 Min 40-69 vs. No hypoglycemia  
 CV < 20% vs. 20-40%  
 CV < 20% vs. > 40%  
 CV 20-40% vs. > 40%

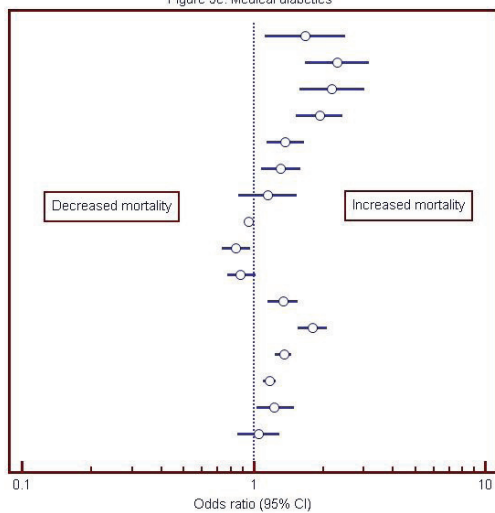**f**

Figure 5f. Surgical diabetics

Mean < 80 vs. 80-110  
 Mean < 80 vs. 110-140  
 Mean < 80 vs. 140-180  
 Mean < 80 vs. > 180  
 Mean 80-110 vs. 110-140  
 Mean 80-110 vs. 140-180  
 Mean 80-110 vs. > 180  
 Mean 110-140 vs. 140-180  
 Mean 110-140 vs. > 180  
 Mean 140-180 vs. > 180  
 Min < 40 vs. 40-69  
 Min < 40 vs. No hypoglycemia  
 Min 40-69 vs. No hypoglycemia  
 CV < 20% vs. 20-40%  
 CV < 20% vs. > 40%  
 CV 20-40% vs. > 40%

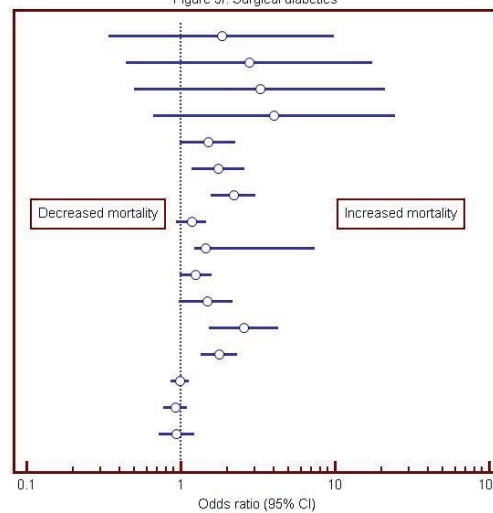

Supplement: MOESM6 [file 9711252]
